# Supplementary material
Source: PubMed Central journal article supplement (PMC9057640)
Supplement: NIHMS1704479-supplement-1.pdf [file NIHMS1704479-supplement-1.pdf]

Supplemental Table 1. Outcome comparison by treatment

| Year | Outcome          | <i>CF-WBI</i> |                     | <i>HF-WBI</i> |                     | P    |
|------|------------------|---------------|---------------------|---------------|---------------------|------|
|      |                  | N             | Mean (95 CI)        | N             | Mean (95 CI)        |      |
| 0    | BCTOS cosmetic   | 144           | 1.51 (1.44-1.58)    | 133           | 1.55 (1.47-1.63)    | 0.48 |
|      | BCTOS functional | 148           | 1.21 (1.15-1.27)    | 135           | 1.29 (1.21-1.37)    | 0.15 |
|      | BCTOS pain       | 148           | 1.66 (1.56-1.76)    | 134           | 1.53 (1.44-1.62)    | 0.07 |
|      | FACT-B SWB       | 149           | 24.36 (23.65-25.07) | 138           | 25.12 (24.35-25.89) | 0.16 |
|      | FACT-B EWB       | 148           | 20.42 (19.98-20.86) | 138           | 20.46 (19.9-21.02)  | 0.92 |
|      | FACT-B TOI       | 148           | 74.03 (72.23-75.83) | 138           | 74.51 (72.56-76.46) | 0.72 |
|      | Body Image Scale | 140           | 3.21 (2.56-3.86)    | 133           | 3.22 (2.50-3.94)    | 0.98 |
|      | MD cosmesis      | 149           | 1.54 (1.43-1.65)    | 138           | 1.50 (1.40-1.60)    | 0.63 |
| 0.5  | BCTOS cosmetic   | 141           | 1.79 (1.69-1.89)    | 126           | 1.76 (1.67-1.85)    | 0.58 |
|      | BCTOS functional | 142           | 1.40 (1.30-1.50)    | 128           | 1.29 (1.21-1.37)    | 0.10 |
|      | BCTOS pain       | 142           | 1.74 (1.63-1.85)    | 127           | 1.72 (1.60-1.84)    | 0.78 |
|      | FACT-B SWB       | 140           | 24.64 (23.91-25.37) | 129           | 24.83 (24.04-25.62) | 0.73 |
|      | FACT-B EWB       | 140           | 21.1 (20.58-21.62)  | 129           | 21.28 (20.78-21.78) | 0.63 |
|      | FACT-B TOI       | 139           | 76.68 (75.01-78.35) | 129           | 78.34 (76.61-80.07) | 0.18 |

|   |                  |     |                     |     |                     |       |
|---|------------------|-----|---------------------|-----|---------------------|-------|
| 1 | Body Image Scale | 135 | 2.62 (1.96-3.28)    | 126 | 2.94 (2.21-3.67)    | 0.53  |
|   | MD cosmesis      | 142 | 1.76 (1.64-1.88)    | 130 | 1.86 (1.73-1.99)    | 0.26  |
|   | BCTOS cosmetic   | 133 | 1.78 (1.69-1.87)    | 121 | 1.77 (1.68-1.86)    | 0.84  |
|   | BCTOS functional | 138 | 1.26 (1.18-1.34)    | 119 | 1.24 (1.17-1.31)    | 0.63  |
|   | BCTOS pain       | 138 | 1.64 (1.54-1.74)    | 120 | 1.59 (1.48-1.70)    | 0.52  |
|   | FACT-B SWB       | 137 | 24.07 (23.21-24.93) | 122 | 24.99 (24.15-25.83) | 0.14  |
|   | FACT-B EWB       | 138 | 21.3 (20.76-21.84)  | 122 | 21.49 (21.02-21.96) | 0.60  |
|   | FACT-B TOI       | 137 | 78.02 (76.37-79.67) | 122 | 78.23 (76.58-79.88) | 0.87  |
|   | Body Image Scale | 132 | 2.46 (1.83-3.09)    | 119 | 3.33 (2.46-4.20)    | 0.11  |
|   | MD cosmesis      | 139 | 1.76 (1.64-1.88)    | 120 | 1.93 (1.79-2.07)    | 0.08  |
| 2 | BCTOS cosmetic   | 129 | 1.79 (1.70-1.88)    | 113 | 1.71 (1.61-1.81)    | 0.24  |
|   | BCTOS functional | 130 | 1.27 (1.19-1.35)    | 114 | 1.25 (1.16-1.34)    | 0.70  |
|   | BCTOS pain       | 130 | 1.64 (1.54-1.74)    | 114 | 1.56 (1.44-1.68)    | 0.37  |
|   | FACT-B SWB       | 132 | 24.09 (23.16-25.02) | 116 | 24.78 (23.91-25.65) | 0.29  |
|   | FACT-B EWB       | 132 | 21.38 (20.91-21.85) | 116 | 21.33 (20.72-21.94) | 0.89  |
|   | FACT-B TOI       | 132 | 76.33 (74.38-78.28) | 116 | 79.32 (77.53-81.11) | 0.029 |
|   | Body Image Scale | 127 | 3.52 (2.76-4.28)    | 113 | 2.95 (2.12-3.78)    | 0.32  |

|   |                  |     |                     |     |                     |       |
|---|------------------|-----|---------------------|-----|---------------------|-------|
|   | MD cosmesis      | 128 | 1.91 (1.78-2.04)    | 112 | 1.87 (1.72-2.02)    | 0.63  |
| 3 | BCTOS cosmetic   | 112 | 1.8 (1.69-1.91)     | 99  | 1.73 (1.62-1.84)    | 0.36  |
|   | BCTOS functional | 113 | 1.25 (1.17-1.33)    | 102 | 1.23 (1.16-1.30)    | 0.71  |
|   | BCTOS pain       | 113 | 1.64 (1.52-1.76)    | 102 | 1.58 (1.46-1.70)    | 0.51  |
|   | FACT-B SWB       | 113 | 23.52 (22.53-24.51) | 102 | 24.07 (22.94-25.20) | 0.47  |
|   | FACT-B EWB       | 113 | 21.58 (21.11-22.05) | 102 | 20.66 (20.05-21.27) | 0.018 |
|   | FACT-B TOI       | 113 | 77.66 (75.88-79.44) | 102 | 77.89 (76.02-79.76) | 0.87  |
|   | Body Image Scale | 108 | 2.78 (2.09-3.47)    | 99  | 3.23 (2.35-4.11)    | 0.42  |
|   | MD cosmesis      | 111 | 1.86 (1.71-2.01)    | 98  | 1.92 (1.74-2.10)    | 0.59  |
| 4 | BCTOS cosmetic   | 107 | 1.79 (1.67-1.91)    | 94  | 1.74 (1.63-1.85)    | 0.63  |
|   | BCTOS functional | 107 | 1.24 (1.15-1.33)    | 93  | 1.28 (1.18-1.38)    | 0.59  |
|   | BCTOS pain       | 107 | 1.59 (1.46-1.72)    | 94  | 1.56 (1.45-1.67)    | 0.72  |
|   | FACT-B SWB       | 109 | 23.32 (22.14-24.5)  | 93  | 24.84 (23.95-25.73) | 0.05  |
|   | FACT-B EWB       | 109 | 20.79 (20.21-21.37) | 93  | 21.42 (20.88-21.96) | 0.13  |
|   | FACT-B TOI       | 109 | 77.43 (75.53-79.33) | 93  | 79.35 (77.55-81.15) | 0.16  |

|             |                  |                  |                     |                  |                     |      |
|-------------|------------------|------------------|---------------------|------------------|---------------------|------|
| 5           | Body Image Scale | 106              | 2.94 (2.17-3.71)    | 91               | 2.85 (2.04-3.66)    | 0.86 |
|             | MD cosmesis      | 108              | 1.94 (1.77-2.11)    | 92               | 2.08 (1.88-2.28)    | 0.32 |
|             | BCTOS cosmetic   | 88               | 1.86 (1.73-1.99)    | 83               | 1.90 (1.77-2.03)    | 0.69 |
|             | BCTOS functional | 88               | 1.30 (1.19-1.41)    | 84               | 1.26 (1.16-1.36)    | 0.67 |
|             | BCTOS pain       | 88               | 1.62 (1.46-1.78)    | 84               | 1.59 (1.45-1.73)    | 0.75 |
|             | FACT-B SWB       | 89               | 23.98 (22.89-25.07) | 84               | 24.39 (23.16-25.62) | 0.62 |
|             | FACT-B EWB       | 89               | 21.35 (20.73-21.97) | 84               | 21.39 (20.75-22.03) | 0.92 |
|             | FACT-B TOI       | 89               | 78.93 (77.03-80.83) | 84               | 78.94 (76.69-81.19) | 1.0  |
|             | Body Image Scale | 85               | 2.91 (2.2-3.62)     | 82               | 2.94 (2.14-3.74)    | 0.95 |
| MD cosmesis | 82               | 2.00 (1.80-2.20) | 81                  | 2.19 (1.98-2.40) | 0.20                |      |

CF-WBI = conventionally fractionated whole breast irradiation, HF-WBI = hypofractionated whole breast irradiation, CI = confidence interval, BCTOS = Breast Cancer Treatment Outcome Scale, FACT-B = Functional Assessment of Cancer Therapy-Breast, SWB = social well-being, EWB = emotional well-being, TOI = Trial Outcome Index, MD cosmesis = physician-rated cosmesis.



# Supplemental Figure 1. Outcomes Over Time

**A**

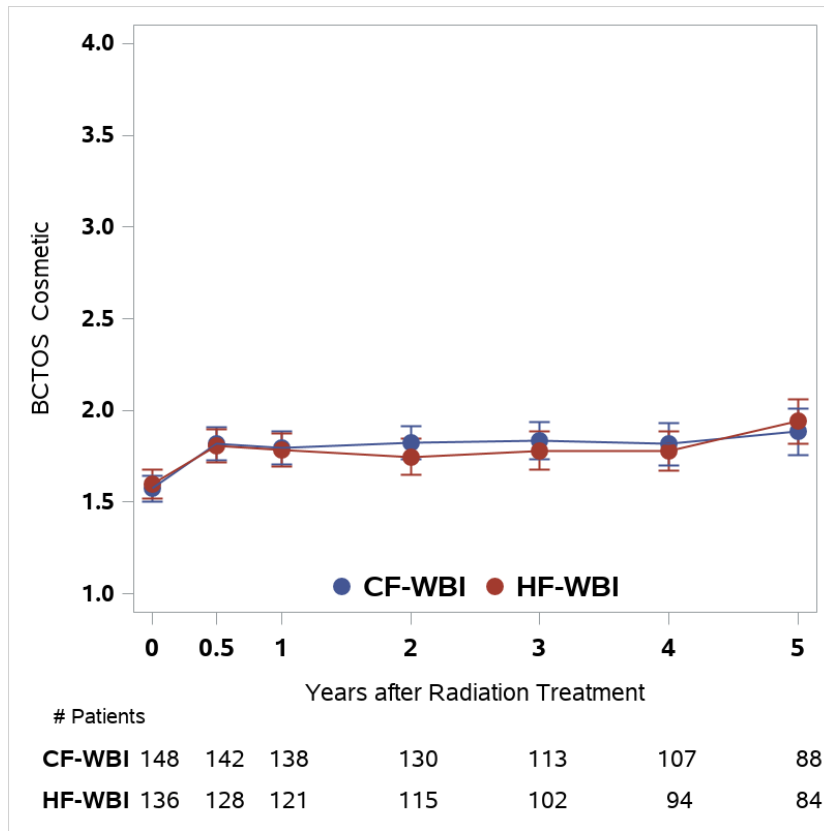

**B**

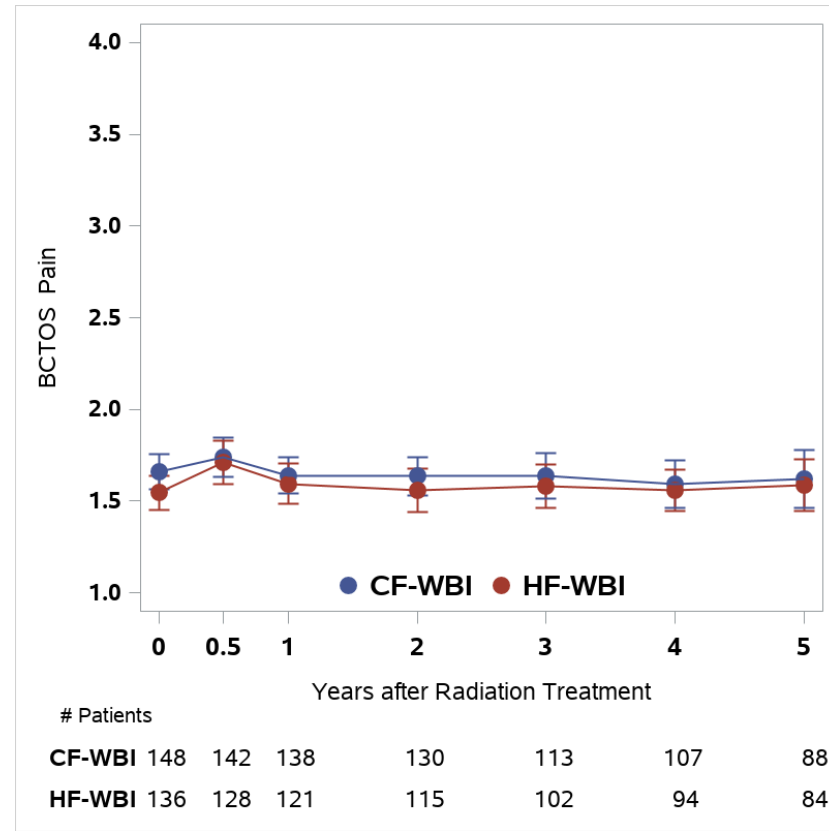

**C**

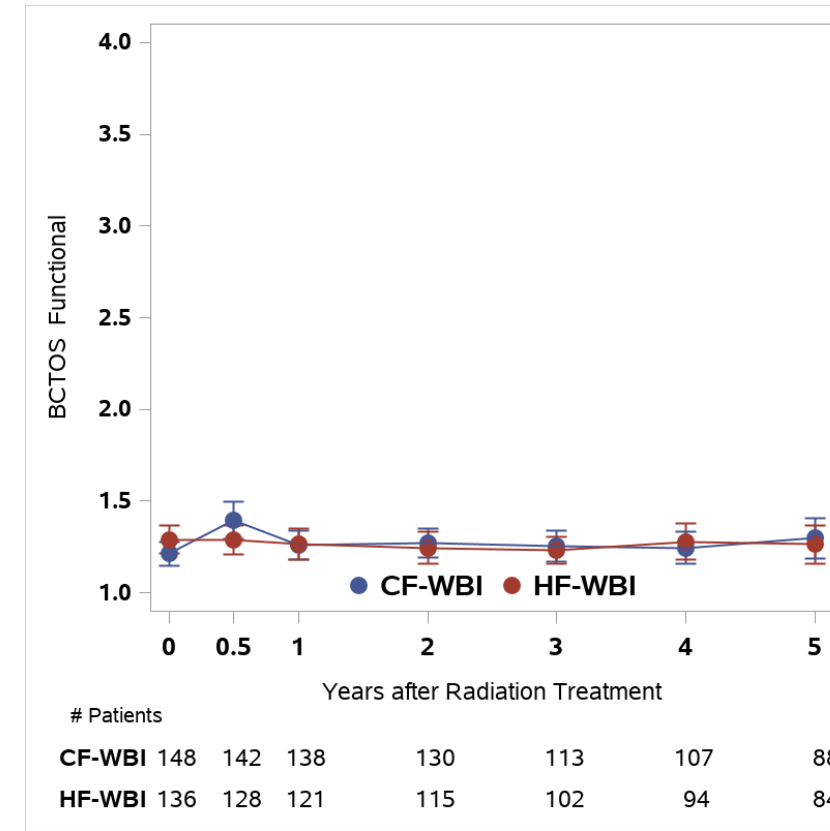

**D**

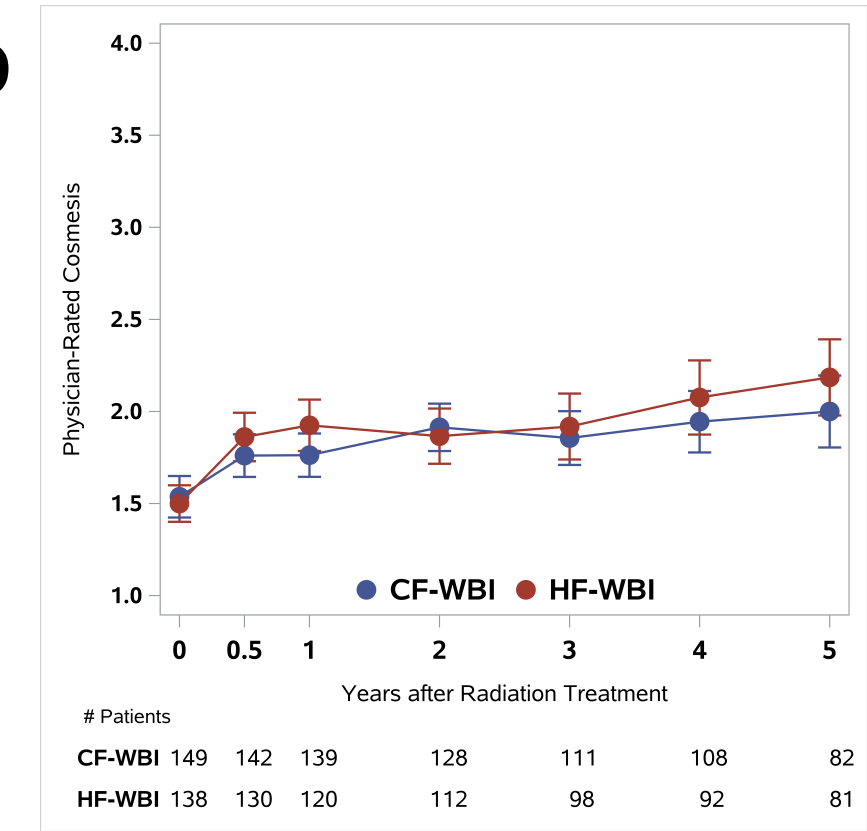

**E**

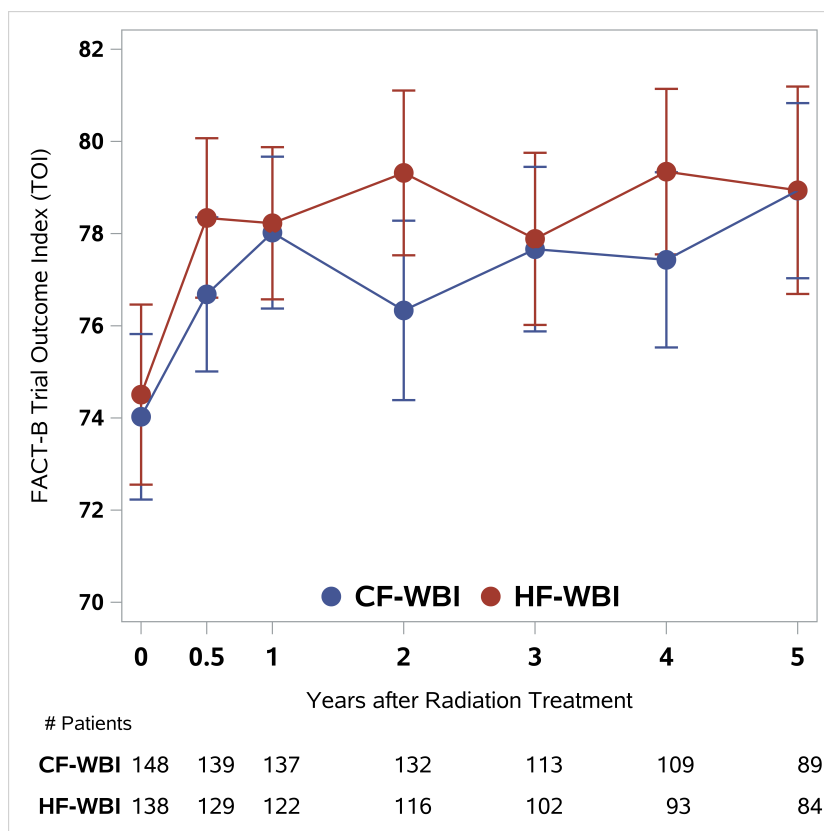

**F**

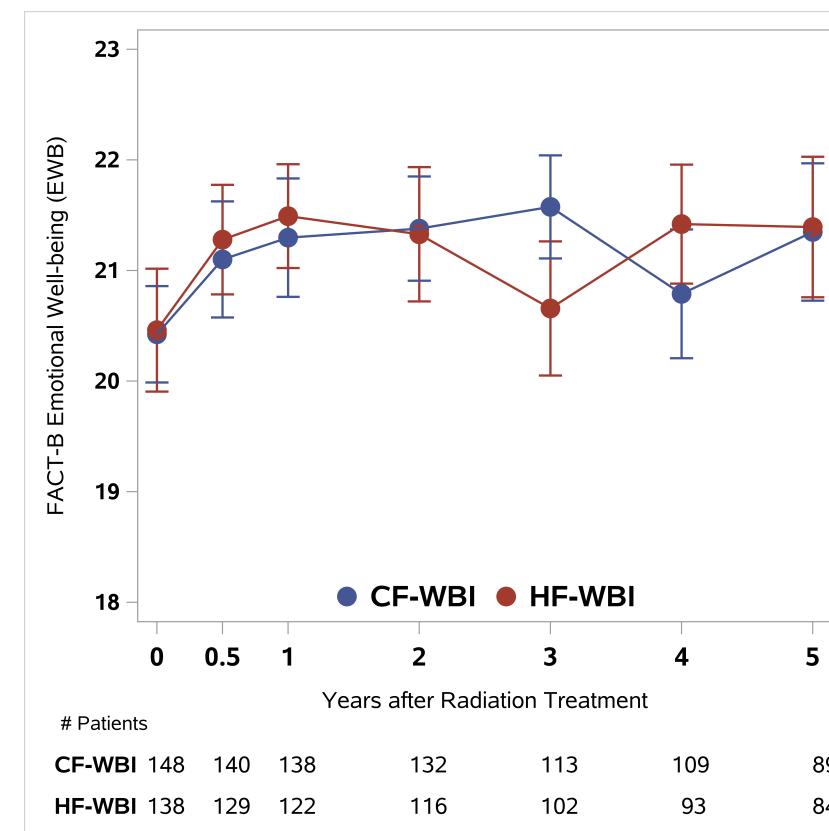

**G**

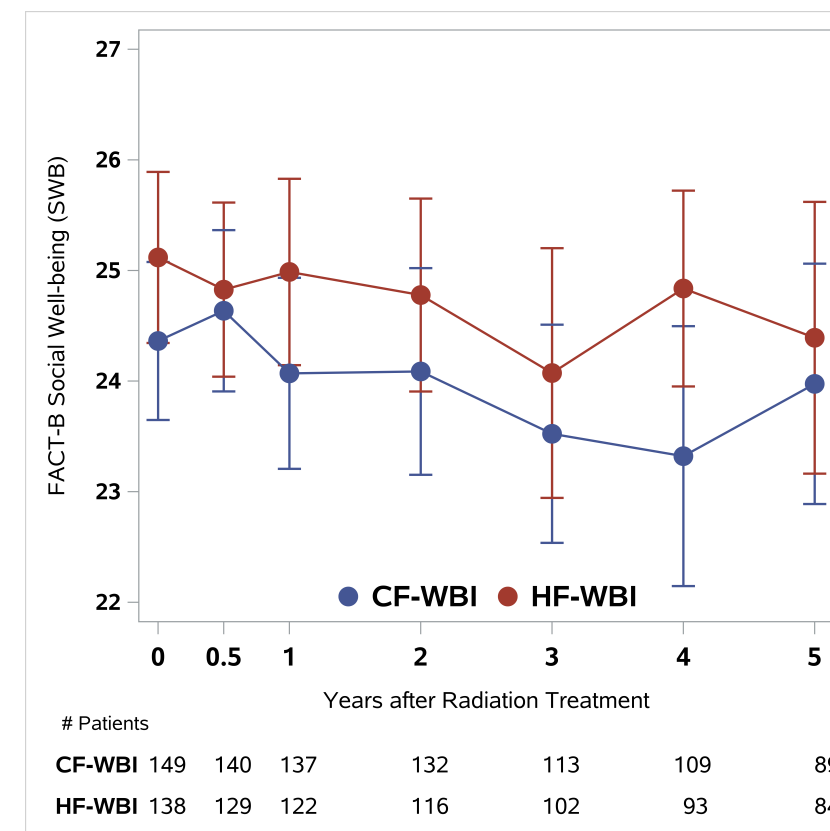

**H**

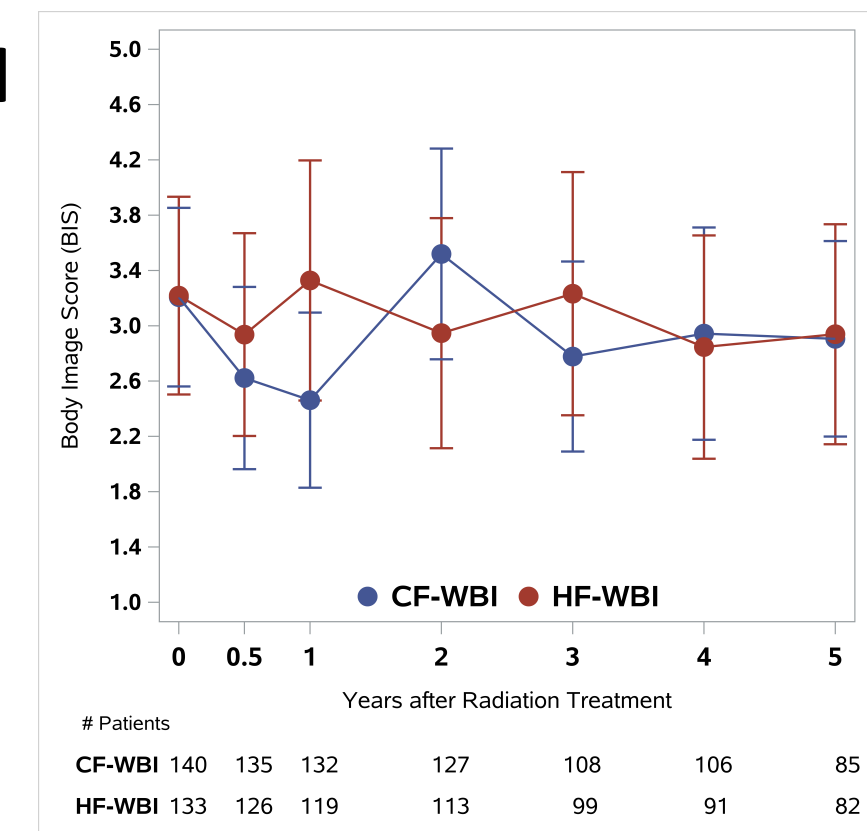

- A. Breast Cancer Treatment Outcome Scale (BCTOS) measure of cosmetic status. Lower scores indicate better outcome.
- B. BCTOS measure of breast pain. Lower scores indicate better outcome.
- C. BCTOS measure of functional status. Lower scores indicate better outcome.
- D. Physician-rated cosmesis. Lower scores indicate better outcome.
- E. Functional Assessment of Cancer Therapy-Breast (FACT-B) Trial Outcome Index. A higher score indicates a better outcome.
- F. FACT-B Emotional Well-being. A higher score indicates a better outcome.
- G. FACT-B Social Well-being. A higher score indicates a better outcome.
- H. Body Image Scale measure of body image status. Lower scores indicate better outcome.

Mean scores with 95% confidence intervals at baseline; 6 months; and 1, 2, 3, 4, and 5 years.  
 CF-WBI = conventionally fractionated whole-breast irradiation, HF-WBI = hypofractionated whole-breast irradiation.
